# Supplementary material for: Trend in mandatory immunisation coverage: linear and joinpoint regression approach, Serbia, 2000 to 2017
Source: PubMed Central journal article supplement (PMC8326657; doi:10.2807/1560-7917.es.2021.26.26.2000417), 2021-07-01
Supplement: FINAL_Supplemental_material.pdf [file FINAL_Supplemental_material.pdf]

# **Trend in mandatory immunisation coverage: linear and joinpoint regression approach, Serbia, 2000 to 2017**

## **Supplementary material**

This supplementary material is hosted by Eurosurveillance as supporting information alongside the article “Trend in mandatory immunisation coverage: linear and joinpoint regression approach, Serbia, 2000 to 2017”, on behalf of the authors, who remain responsible for the accuracy and appropriateness of the content. The same standards for ethics, copyright, attributions and permissions as for the article apply. Supplements are not edited by Eurosurveillance and the journal is not responsible for the maintenance of any links or email addresses provided therein.

District (local) Institutes of Public Health include:

- 1) Institute of Public Health in Subotica
- 2) Institute of Public Health in Zrenjanin
- 3) Institute of Public Health in Kikinda
- 4) Institute of Public Health in Pancevo
- 5) Institute of Public Health in Sombor
- 6) Institute of Public Health of Vojvodina
- 7) Institute of Public Health in Sremska Mitrovica
- 8) Institute of Public Health in Sabac
- 9) Institute of Public Health in Valjevo
- 10) Institute of Public Health in Pozarevac
- 11) Institute of Public Health in Kragujevac
- 12) Institute of Public Health in Cuprija
- 13) Institute of Public Health in Zajecar
- 14) Institute of Public Health in Uzice
- 15) Institute of Public Health in Cacak
- 16) Institute of Public Health in Kraljevo

- 17) Institute of Public Health in Krusevac
- 18) Institute of Public Health in Nis
- 19) Institute of Public Health in Pirot
- 20) Institute of Public Health in Leskovac
- 21) Institute of Public Health in Vranje
- 22) Institute of Public Health in Kosovska Mitrovica
- 23) Institute of Public Health in Belgrade

**Supplementary Table S1** Mandatory immunization coverage in the Republic of Serbia during the period 2000-2017 (calculated as the proportion of vaccinated children in the specific age group (i.e. birth cohort) intended to receive vaccines according to the National immunization schedule in that particular year)

| Year | Coverage (%) |                       |                      |              |              |                    |                     |       |       |                          |                              |                                                                |                |            |                    |
|------|--------------|-----------------------|----------------------|--------------|--------------|--------------------|---------------------|-------|-------|--------------------------|------------------------------|----------------------------------------------------------------|----------------|------------|--------------------|
|      | BCG          | tOPV3 / DTaP-IPV-Hib3 | tOPV/DTaP-IPV-Hib R1 | tOPV/bOPV R2 | tOPV/bOPV R3 | DTP3/DTaP-IPV-Hib3 | DTP/DTaP-IPV-Hib R1 | DT R2 | dT R3 | MMR 1 <sup>st</sup> dose | MMR 2 <sup>nd</sup> dose 12y | MMR 2 <sup>nd</sup> dose before enrolment in elementary school | Hep B3 infants | Hep B3 12y | Hib3/DTaP-IPV-Hib3 |
| 2000 | ND           | 96.8                  | 96.6                 | 98.2         | 97.5         | 96.9               | 96.5                | 98.1  | 96.9  | 86.6                     | 75.4                         | NA                                                             | NA             | NA         | NA                 |
| 2001 | ND           | 97.6                  | 96.7                 | 98.6         | 97.8         | 97.8               | 96.7                | 98.4  | 97.8  | 95.7                     | 88.3                         | NA                                                             | NA             | NA         | NA                 |
| 2002 | ND           | 97.8                  | 97.7                 | 99.0         | 98.9         | 97.9               | 97.6                | 98.9  | 98.9  | 93.8                     | 68.3                         | NA                                                             | NA             | NA         | NA                 |
| 2003 | ND           | 98.0                  | 97.3                 | 99.0         | 98.5         | 97.8               | 97.2                | 98.8  | 98.5  | 95.9                     | 92.8                         | NA                                                             | NA             | NA         | NA                 |
| 2004 | 96.5         | 98.0                  | 97.5                 | 99.0         | 98.9         | 98.1               | 97.5                | 98.9  | 98.4  | 95.9                     | 92.8                         | NA                                                             | NA             | NA         | NA                 |
| 2005 | 97.8         | 97.8                  | 97.7                 | 98.5         | 98.7         | 97.7               | 97.6                | 98.6  | 98.6  | 95.6                     | 98.1                         | NA                                                             | 65.1           | NA         | NA                 |
| 2006 | 98.8         | 97.2                  | 96.4                 | 98.2         | 97.9         | 96.8               | 96.2                | 98.4  | 98.1  | 95.9                     | 95.0                         | 94.3                                                           | 92.1           | 56.9       | 74.3               |
| 2007 | 98.2         | 97.9                  | 96.9                 | 98.4         | 96.4         | 98.0               | 96.8                | 98.0  | 96.8  | 96.7                     | 86.7                         | 94.3                                                           | 93.8           | 79.8       | 90.8               |
| 2008 | 98.5         | 97.5                  | 96.2                 | 97.8         | 98.2         | 97.5               | 96.2                | 97.8  | 98.3  | 96.4                     | 94.9                         | 97.1                                                           | 93.7           | 78.0       | 97.2               |
| 2009 | 98.3         | 97.4                  | 96.3                 | 98.0         | 97.1         | 97.4               | 96.1                | 97.7  | 97.1  | 95.9                     | 88.8                         | 95.3                                                           | 95.2           | 61.8       | 96.3               |
| 2010 | 98.8         | 97.1                  | 95.9                 | 98.0         | 94.7         | 97.2               | 95.7                | 98.1  | 94.3  | 95.7                     | 96.7                         | 98.1                                                           | 94.9           | 75.9       | 96.8               |
| 2011 | 98.6         | 97.6                  | 95.9                 | 98.1         | 96.6         | 97.5               | 95.9                | 98.4  | 96.7  | 96.5                     | 91.8                         | 98.0                                                           | 96.4           | 87.1       | 96.5               |
| 2012 | 97.9         | 93.7                  | 92.2                 | 96.3         | 83.4         | 95.9               | 93.1                | 96.9  | 86.7  | 90.4                     | NA                           | 94.2                                                           | 93.1           | 82.7       | 91.3               |
| 2013 | 97.4         | 97.4                  | 92.9                 | 96.0         | 95.4         | 96.9               | 93.1                | 96.1  | 95.4  | 92.6                     | NA                           | 84.1                                                           | 93.4           | 74.3       | 94.7               |
| 2014 | 97.6         | 95.1                  | 90.6                 | 95.3         | 91.2         | 95.0               | 90.3                | 95.2  | 92.4  | 85.8                     | NA                           | 89.2                                                           | 93.9           | 78.1       | 95.2               |
| 2015 | 98.3         | 94.9                  | 83.8                 | 90.8         | 67.6         | 95.0               | 88.7                | 92.8  | 81.7  | 84.0                     | NA                           | 87.5                                                           | 91.5           | 72.7       | 94.1               |
| 2016 | 97.9         | 94.2                  | 87.3                 | 87.6         | 75.3         | 94.1               | 86.7                | 92.8  | 81.3  | 81.0                     | NA                           | 91.1                                                           | 90.5           | 63.6       | 93.7               |
| 2017 | 97.4         | 95.2                  | 87.1                 | 92.5         | 91.3         | 95.1               | 86.8                | 93.2  | 91.9  | 85.2                     | NA                           | 91.6                                                           | 92.4           | 69.2       | 95.2               |

BCG – *Bacillus Calmette–Guérin* vaccine; bOPV – bivalent oral poliovaccine; DTP – diphtheria and tetanus toxoids, whole-cell pertussis; DTaP-IPV-Hib – diphtheria and tetanus toxoids, acellular pertussis, inactivated poliovirus and conjugated vaccine against diseases caused by *Hib*; DT – diphtheria and tetanus toxoids booster for children, dT – diphtheria and tetanus toxoids booster for adults; Hep B – monovalent vaccine against hepatitis B; Hib – monovalent conjugated vaccine against diseases caused by *Haemophilus influenzae* type b; MMR – vaccine against measles, mumps and rubella; tOPV – trivalent oral poliovaccine.

ND – no data; NA- not applicable;

Number 3 denotes the number of doses used in primary vaccination; R1 – first revaccination; R2 – second revaccination; R3 – third revaccination.
